# Supplementary material
Source: Springer Nature journal article supplement (https://www.springermedizin.de/resource/supplementary/12916_2010_457_MOESM4_ESM.pdf/9599706)

*BurnedOut*

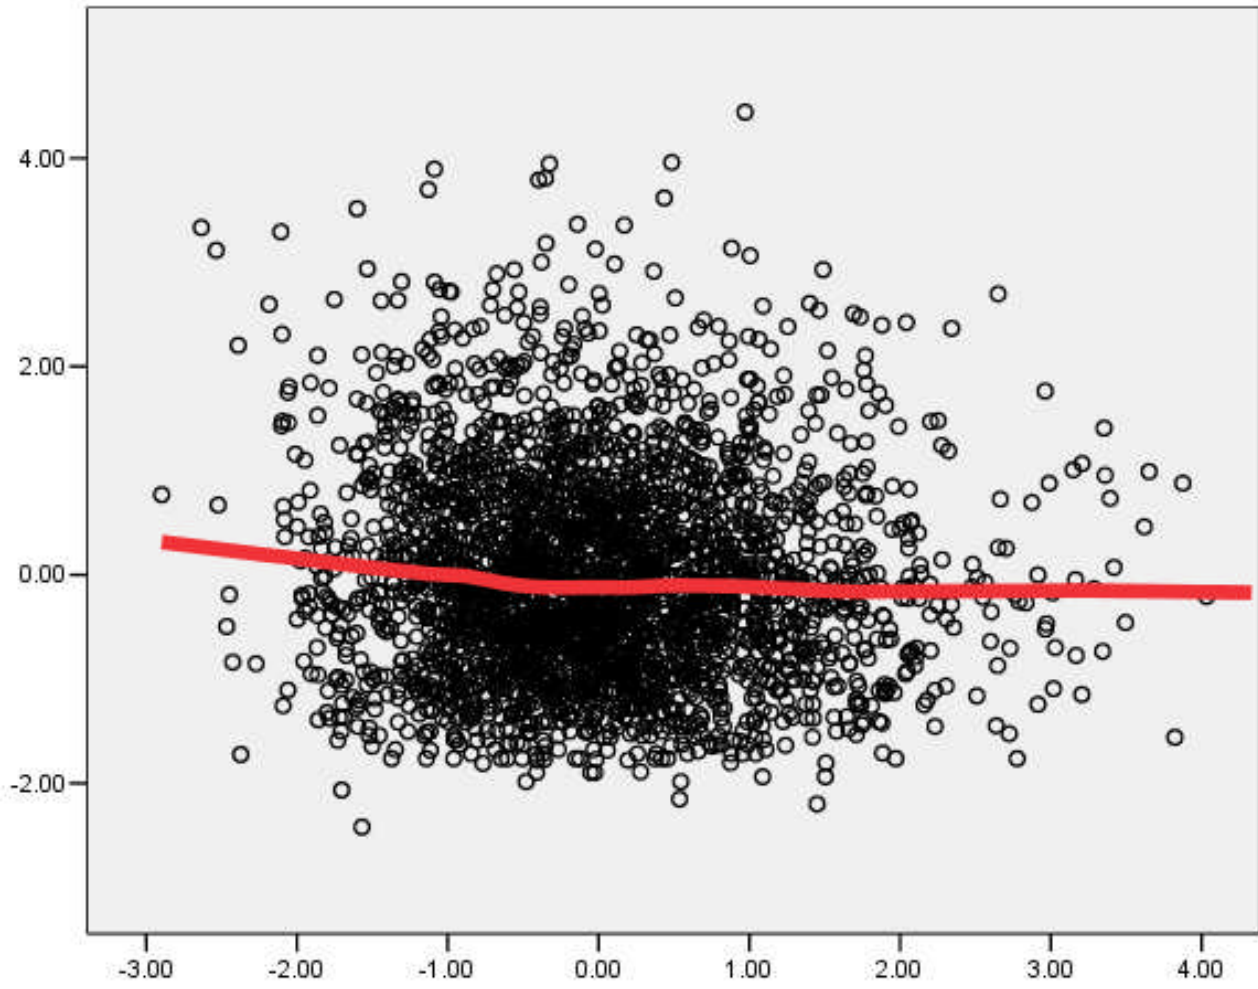

*Avocation/Leisure*

Supplement: MOESM4 [file 9599706]
